# Supplementary material for: PLEKHA7, an Apical Adherens Junction Protein, Suppresses Inflammatory Breast Cancer in the Context of High E-Cadherin and p120-Catenin Expression
Source: PubMed Central journal article supplement (PMC7865280; doi:10.3390/ijms22031275), 2021-01-28
Supplement: ijms-22-01275-s001.pdf [file ijms-22-01275-s001.pdf]

Supplementary

## PLEKHA7, An Apical Adherens Junction Protein, Suppresses Inflammatory Breast Cancer in the Context of High E-cadherin and p120-catenin Expression

Lindy J. Pence <sup>1</sup>, Antonis Kourtidis <sup>2</sup>, Ryan W. Feathers <sup>1</sup>, Mary T. Haddad <sup>1</sup>, Sotiris Sotiriou <sup>3</sup>, Paul A. Decker <sup>4</sup>, Aziza Nassar <sup>5</sup>, Idris T. Ocal <sup>6</sup>, Sejal S. Shah <sup>7</sup> and Panos Z. Anastasiadis <sup>1,\*</sup>

<sup>1</sup> Department of Cancer Biology, Mayo Clinic, Jacksonville, FL 32224, USA; emails: pence.lindy@mayo.edu (L.J.P.); feathers.ryan@mayo.edu (R.W.F.); haddad.mary@mayo.edu (M.T.H.); panos@mayo.edu (P.Z.A.)

<sup>2</sup> Department of Regenerative Medicine and Cell Biology, Medical University of South Carolina, Charleston, SC 29425, USA; [kourtidi@musc.edu](mailto:kourtidi@musc.edu)

<sup>3</sup> Department of Laboratory Medicine and Pathology, Mayo Clinic, Rochester, MN 55901, USA; sotiriou.sotiris@mayo.edu

<sup>4</sup> Department of Health Sciences Research, Mayo Clinic, Rochester, MN 55901, USA; [decker.paul@mayo.edu](mailto:decker.paul@mayo.edu)

<sup>5</sup> Department of Laboratory Medicine and Pathology, Mayo Clinic, Jacksonville, FL 32224, USA; [nassar.aziza@mayo.edu](mailto:nassar.aziza@mayo.edu)

<sup>6</sup> Department of Laboratory Medicine and Pathology, Mayo Clinic, Phoenix, AZ 85054, USA; [ocal.toljay@mayo.edu](mailto:ocal.toljay@mayo.edu)

<sup>7</sup> Department of Pathology, Kaiser Permanente, Irvine, CA 92618, USA; [sejal.s.shah@kp.org](mailto:sejal.s.shah@kp.org)

\* Correspondence: [panos@mayo.edu](mailto:panos@mayo.edu); Tel.: 904-953-2609

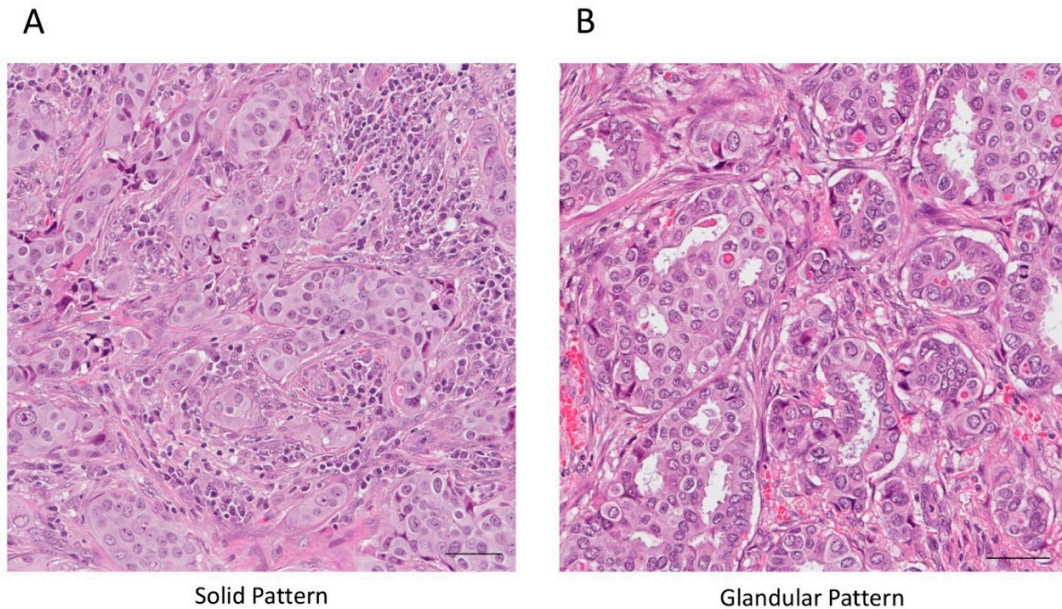

**Figure S1.** Tumor patterns observed in IBC patient samples. **A)** Example of H&E from IBC tumor demonstrating solid cellular pattern. **B)** Example of H&E from IBC tumor demonstrating glandular cellular pattern. Scale bar represents 100µm.

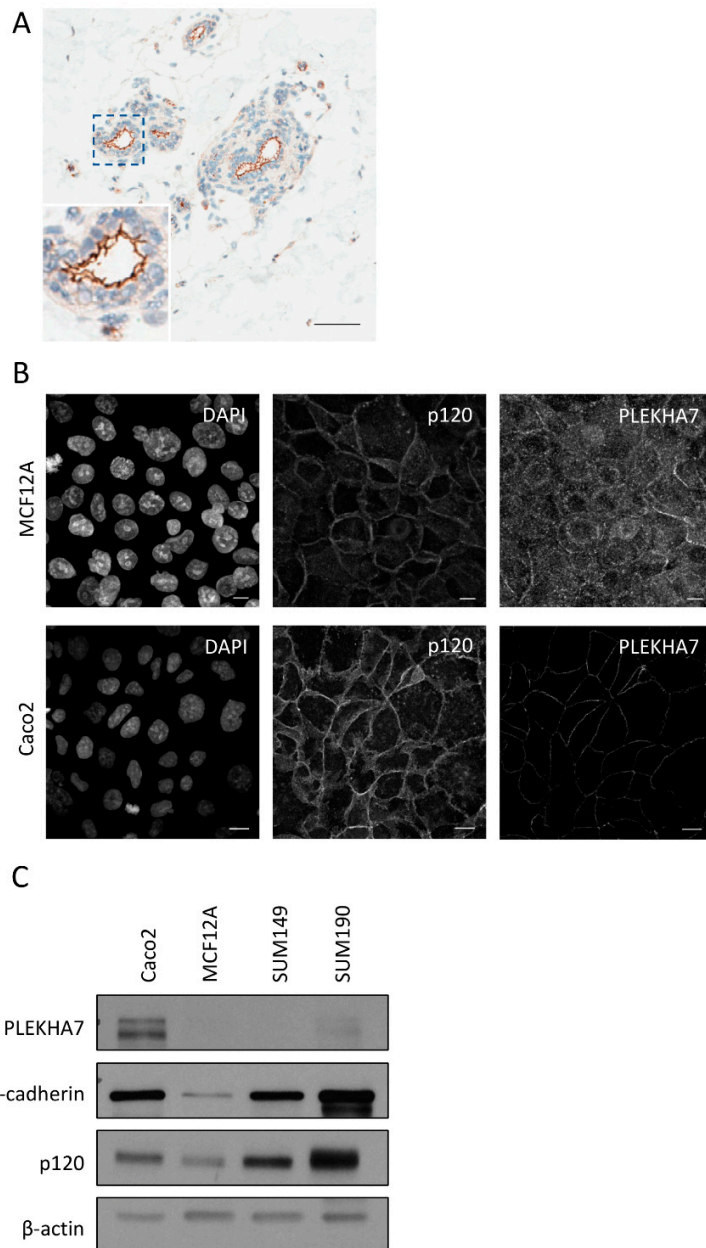

**Figure S2.** PLEKHA7 expression and localization. **A)** Example of PLEKHA7 staining in a normal breast sample by immunohistochemistry. Scale bar is 100 $\mu$ m. **B)** Immunofluorescence staining of PLEKHA7, p120-catenin and DAPI in MCF12A cell line (scale bar = 10 $\mu$ m) and in Caco2 cell line (scale bar = 20 $\mu$ m). Note: Comparison of intensity is not possible as laser power was different across the two cell lines. **C).** Protein levels of PLEKHA7, E-cadherin, p120-catenin across Caco2, MCF12A, SUM149, and SUM190 cell lines by Western blot.  $\beta$ -actin is used as the loading control.

A

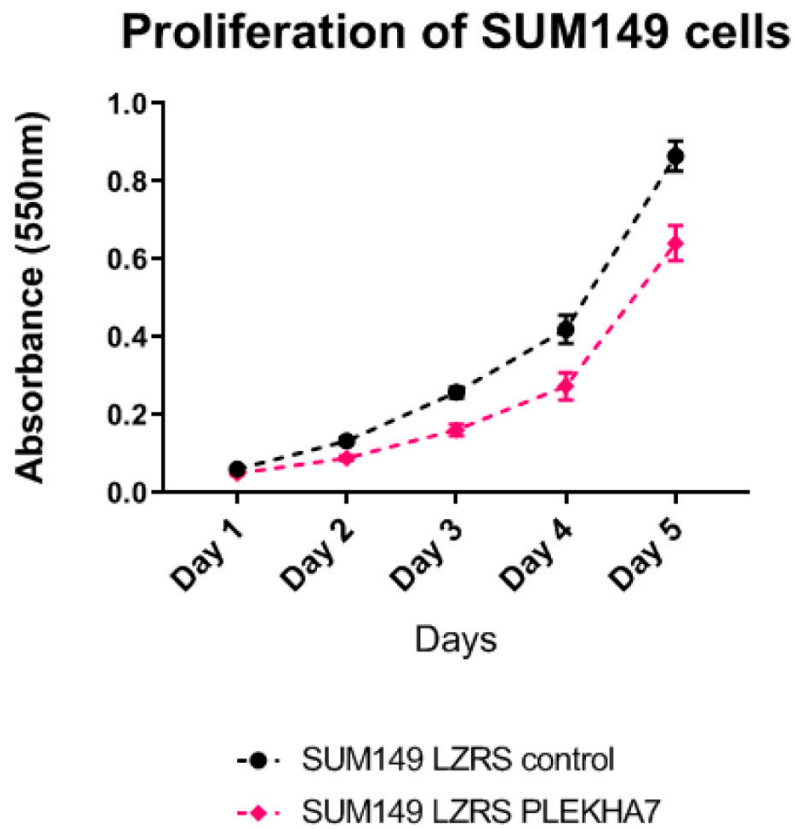

**Figure S3:** Effects of PLEKHA7 re-expression in SUM149 cell growth in 2D culture. A) A representative graph displaying cell growth over time, as measured by the MTT cell metabolic assay, between SUM149 LZRS ms neo (control) and SUM149 LZRS PLEKHA7 cells cultured in 2D.



Table S1. Characterization of IBC Patient Samples.

| Location   | Solid/Tubular formation | Nuclear pleomorphism | % of SOLID tumor that is P7+ | pattern for SOLID areas | % of overall tumor expressing basal PLEKHA7 | % of P7 in gland | P7 pattern in gland | % of overall tumor that is apical PLEKHA7+ | PLEKHA7 intensity |
|------------|-------------------------|----------------------|------------------------------|-------------------------|---------------------------------------------|------------------|---------------------|--------------------------------------------|-------------------|
| Dermis     | 97/3                    | 2                    | 90                           | basal                   | 87.30%                                      | 90               | apical              | 2.70%                                      | 3                 |
| Lymph node | 99/1                    | 3                    | 70                           | basal                   | 69.30%                                      | 50               | apical              | 0.50%                                      | 2+3               |
| Dermis     | 99/1                    | 3                    | 60                           | basal                   | 59.40%                                      | 50               | apical              | 0.50%                                      | 2+3               |
| Lymph node | 98/2                    | 3                    | 20                           | basal                   | 19.60%                                      | 5                | apical              | 0.10%                                      | 1                 |
| Breast     | 97/3                    | 3                    | 90                           | basal                   | 87.30%                                      | 40               | apical              | 1.20%                                      | 3                 |
| Dermis     | 100/0                   | 3                    | 50                           | basal                   | 50%                                         | no glands        | none                | 0                                          | 2+3               |
| Dermis     | 95/5                    | 3                    | 70                           | basal                   | 66.50%                                      | 60               | apical              | 3%                                         | 2+3               |
| Dermis     | 95/5                    | 3                    | 60                           | basal                   | 57%                                         | 0                | none                | 0                                          | 2                 |
| Lymph node | 90/10                   | 3                    | 90                           | basal                   | 81%                                         | 50               | apical              | 5%                                         | 2+3               |
| Lymph node | 98/2                    | 3                    | 70                           | cytoplasmic             | 68.6% (CYTOPLASMIC)                         | 0                | none                | 0                                          | 2                 |
| Breast     | 75/25                   |                      | 0                            |                         | 0                                           | 40               | apical              | 10%                                        | 2                 |
| Breast     | 90/10                   | 2                    | 70                           | basal                   | 63%                                         | 60               | apical              | 6%                                         | 2+3               |
| Dermis     | 60/40                   | 3                    | 50                           | basal                   | 30%                                         | 50               | apical              | 20%                                        | 2                 |
| Dermis     | 96/4                    | 3                    | 70                           | basal                   | 67.20%                                      | 70               | apical              | 2.80%                                      | 2+3               |
| Dermis     | 96/4                    | 3                    | 10                           | basal                   | 9.60%                                       | 0                | none                | 0                                          | 2                 |
| Dermis     | 97/3                    | 3                    | 10                           | basal                   | 9.70%                                       | 0                | none                | 0                                          | 2                 |
| Dermis     | 97/3                    | 3                    | 10                           | basal                   | 9.70%                                       | 0                | none                | 0                                          | 2                 |
| Lymph node | 95/5                    | 3                    | 80                           | basal                   | 76%                                         | 30               | apical              | 1.50%                                      | 3                 |
| Dermis     | 97/3                    | 2                    | 50                           | basal                   | 48.50%                                      | 0                | none                | 0                                          | 1                 |
| Dermis     | 99/1                    | 2                    | 90                           | cytoplasmic             | 89.1% (CYTOPLASMIC)                         | 0                | none                | 0                                          | 2                 |
| Dermis     | 98/2                    | 3                    | 20                           | basal                   | 19.60%                                      | 0                | none                | 0                                          | 1                 |
| Lymph node | 98/2                    | 3                    | 40                           | basal                   | 39.20%                                      | 0                | none                | 0                                          | 1+2               |
| Breast     | 99/1                    | 3                    | 20                           | basal                   | 19.80%                                      | 0                | none                | 0                                          | 1+2               |
| Dermis     | 75/25                   | 3                    | 0                            |                         | 0                                           | 80               | apical              | 20%                                        | 3                 |
| Breast     | 80/20                   | 3                    | 70                           | basal                   | 56%                                         | 30               | apical              | 6%                                         | 3                 |
| Dermis     | 95/5                    | 2                    | 90                           | basal                   | 85.50%                                      | 80               | apical              | 4%                                         | 3                 |
| Dermis     | 100/0                   | 2                    | 40                           | basal                   | 40%                                         | 0                | none                | 0                                          | 2                 |
| Lymph node | 90/10                   | 3                    | 0                            |                         | 0                                           | 10               | apical              | 1%                                         | 2                 |
| Lymph node | 85/15                   | 1                    | 0                            |                         | 0                                           | 0                | none                | 0                                          | 1                 |
| Lymph node | 95/5                    | 3                    | 50                           | basal                   | 47.50%                                      | 40               | apical              | 2%                                         | 2                 |
| Lymph node | 95/5                    | 2                    | 90                           | basal                   | 85.50%                                      | 80               | apical              | 4%                                         | 3                 |
| Lymph node | 90/10                   | 3                    | 30                           | basal                   | 27%                                         | 30               | apical              | 3%                                         | 2                 |
| Dermis     | 90/10                   | 3                    | 0                            |                         | 0                                           | 70               | apical              | 7%                                         | 2                 |
| Dermis     | 100/0                   | 3                    | 10                           | basal                   | 10%                                         | 0                | none                | 0                                          | 1                 |
| Dermis     | 100/0                   | 3                    | 30                           | basal                   | 30%                                         | 0                | none                | 0                                          | 2                 |

|        |       |   |    |       |        |    |        |       |     |
|--------|-------|---|----|-------|--------|----|--------|-------|-----|
| Breast | 60/40 | 3 | 0  |       | 0      | 70 | apical | 28%   | 3   |
| Breast | 50/50 | 2 | 40 | basal | 20%    | 40 | apical | 20%   | 2+3 |
| Breast | 95/5  | 3 | 90 | basal | 85.50% | 90 | apical | 4.50% | 3   |
| Breast | 45/55 | 2 | 70 | basal | 31.50% | 40 | apical | 22%   | 2+3 |
| Breast | 20/80 | 2 | 40 | basal | 8%     | 0  | none   | 0     | 2+3 |
| Breast | 99/1  | 3 | 30 | basal | 29.70% | 0  | none   | 0     | 2   |
| Breast | 98/2  | 3 | 40 | basal | 39.20% | 0  | none   | 0     | 2   |
| Breast | 95/5  | 2 | 90 | basal | 85.50% | 0  | none   | 0     | 2   |
| Breast | 99/1  | 3 | 80 | basal | 79.20% | 80 | apical | 0.80% | 2+3 |
| Breast | 95/5  | 3 | 70 | basal | 66.50% | 80 | apical | 4%    | 2+3 |
| Breast | 100/0 | 2 | 30 | basal | 30%    | 0  | none   | 0     | 1+2 |
| Breast | 99/1  | 2 | 10 | basal | 9.90%  | 0  | none   | 0     | 1   |
